# Supplementary material
Source: PubMed Central journal article supplement (PMC3421988)
Supplement: supp_ers132_00069963_file001.pdf [file supp_ers132_00069963_file001.pdf]

## The effects of auxin and strigolactones on tuber initiation and stolon architecture in potato

*Efstathios Roumeliotis, Bjorn Kloosterman, Marian Oortwijn, Wouter Kohlen, Haro J Bouwmeester, Richard G F Visser, and Christian W B Bachem*

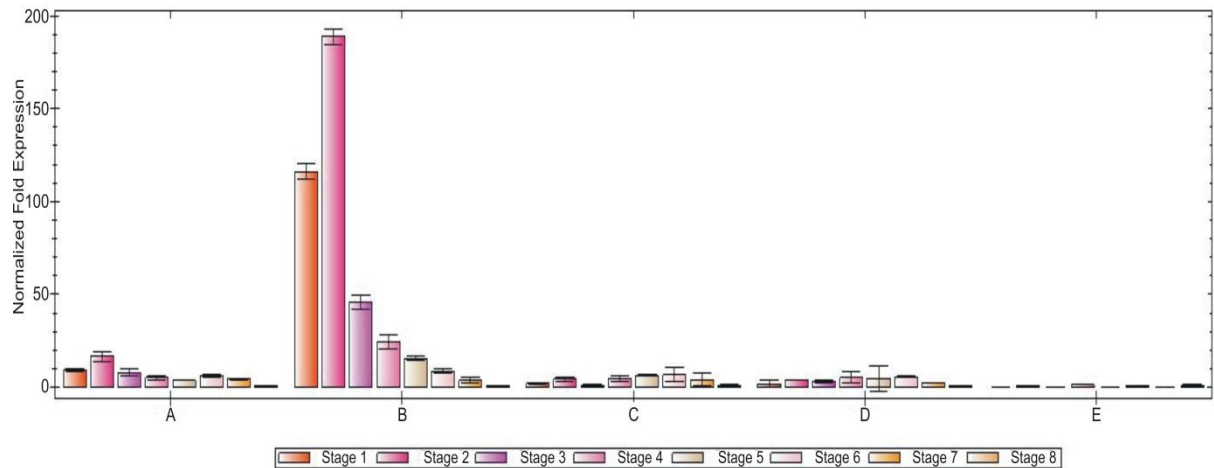

Supplementary Figure S1.

Expression analysis of five StYUC-like genes during early stages in tuber development. Stage 1; stolon tip grown under long day conditions (16h) light. Stage 2; Stolon tip harvested 5 days after switch (5 DAS) to short day conditions (8 h light). Stage 3; First visible stolon swelling harvested 6-7 DAS. Stage 4; tuber initiation (7-8 DAS). Stage 5; Tuber size 1, with diameter of < 0.8 cm (9-10DAS). Stage 6; Tuber size 2 (11-12 DAS). Stage 7; Tuber size 3 (15DAS). Stage 8; Tuber size 4 > (25 DAS). On the X axis, A corresponds to transcript number PGSC0003DMT400030255 in the potato genome (PGSC, 2011), B to PGSC0003DMT400038139 (StYUC-like1), C to PGSC0003DMT400092778, D to PGSC0003DMT400051713 and E to PGSC0003DMT400097007.
